# Supplementary material
Source: ML conference proceedings conference paper supplement (https://proceedings.neurips.cc/paper_files/paper/2022/hash/15349e1c554406b7719d047a498e7117-Abstract.html)
Supplement: Supplementary file 1 [file 15349e1c554406b7719d047a498e7117-Supplemental-Conference.pdf]

## 413 A Proofs

414 In this section, we provide proofs for the theoretical results presented in the paper.

### 415 A.1 Convergence of CAUSAL-UCB\* and CAUSAL-TS\*

416 Next we provide proofs for the regret bounds for CAUSAL-UCB\* and CAUSAL-TS\*. We begin  
417 by introducing some necessary lemmas. We first establish that the proposed  $\hat{Q}[\mathbf{C}]$  is a consistent  
418 estimate for c-factor  $Q[\mathbf{C}]$ , for every  $\mathbf{C} \in \mathbb{C}$ . It will allow us to show that the confidence set  $\mathcal{M}_t$   
419 contains the underlying SCM  $M$  with high probabilities.

420 **Lemma 1.** *For a causal diagram  $\mathcal{G}$ , let  $\mathbf{C} \in \mathbb{C}$  be a c-component in  $\mathcal{G}$ . Then, c-factor  $Q[\mathbf{C}]$  factorizes  
421 over a topological ordering  $\prec$  in  $\mathcal{G}$  as follows:*

$$Q[\mathbf{C}] = \prod_{V \in \mathbf{C}} q(V \mid \mathbf{pa}_V^+) \quad (6)$$

422 where extended parents  $\mathbf{PA}_V^+ = \text{Pa}(\mathbf{C}_V) \setminus \{V\}$ ;  $\mathbf{C}_V$  is the c-component containing  $V$  in  $\mathcal{G}[\{V' \in$   
423  $\mathbf{C} \mid V' \prec V\}]$ . Moreover,  $q(V \mid \mathbf{PA}_V^+) = P(V \mid \mathbf{PA}_V^+, \text{do}(\pi))$  for any policy  $\pi \in \Pi_{\mathbb{S}(\mathbf{C})}$ .

424 *Proof.* The decomposition follows from the semi-Markovian factorization in [7] Def. 15].  $\square$

425 **Lemma 2.** *Fix  $\delta \in (0, 1)$ . With probability (w.p.)  $1 - \frac{\delta}{2}$ ,  $M \in \mathcal{M}_t$  for all time steps  $t = 1, 2, \dots$*

426 *Proof.* Fix a time step  $t$ . For every c-component  $\mathbf{C} \in \mathbb{C}$  and every  $V \in \mathbf{C}$  and any  $\mathbf{pa}_V^+ \in \Omega_{\mathbf{PA}_V^+}$ ,  
427 define function  $f_V(t, \delta)$  as

$$f_V(t, \delta) = \sqrt{\frac{6|\Omega_V| \ln(2|\Omega_{\mathbf{PA}_V^+}| |\mathbf{V}(\mathbf{C})| t / \delta)}{\max\{n_t(\mathbf{pa}_V^+), 1\}}}. \quad (20)$$

428 Fix  $n_t(\mathbf{pa}_V^+) = n$ . It follows from the concentration inequality in [22] C.1] that

$$P(\|q(\cdot \mid \mathbf{pa}_V^+) - \hat{q}_t(\cdot \mid \mathbf{pa}_V^+)\|_1 > f_V(t, \delta) \text{ and } n_t(\mathbf{pa}_V^+) = n) \leq \frac{\delta}{4t^3 |\Omega_{\mathbf{PA}_V^+}| |\mathbf{V}(\mathbf{C})|} \quad (21)$$

429 Hence a union bound over all possible values of  $n_t(\mathbf{pa}_V^+)$  implies that Eq. (4) holds at any time step  
430  $t$  with probability at most

$$P(\|q(\cdot \mid \mathbf{pa}_V^+) - \hat{q}_t(\cdot \mid \mathbf{pa}_V^+)\|_1 > f_V(t, \delta)) \leq \frac{\delta}{4t^2 |\Omega_{\mathbf{PA}_V^+}| |\mathbf{V}(\mathbf{C})|} \quad (22)$$

431 Summing these error probabilities over all realizations  $\mathbf{pa}_V^+$  for every variable  $V \in \mathbf{V}(\mathbf{C})$  gives  
432  $P(M \notin \mathcal{M}_t) \leq \frac{\delta}{4t^2}$ . A union bound over all times steps  $t = 1, 2, \dots$  implies:

$$P(\forall t = 1, 2, \dots, M \in \mathcal{M}_t) \geq 1 - \sum_{t=1}^{\infty} P(M \notin \mathcal{M}_t) \geq 1 - \sum_{t=1}^{\infty} \frac{\delta}{4t^2} \geq 1 - \frac{\delta}{2}. \quad (23)$$

433 This proves the claimed concentration bound.  $\square$

434 **Lemma 3.** *Fix  $\delta \in (0, 1)$ . W.p. at least  $1 - \frac{\delta}{2}$ , for any  $T > 1$ ,*

$$\sum_{t=1}^T \mathbb{E}_M[Y \mid \text{do}(\pi_t)] - Y_t \leq \sqrt{2T \log(T/\delta)} \quad (24)$$

435 *Proof.* Let  $Z_t = \mathbb{E}_M[Y \mid \text{do}(\pi_t)] - Y_t$  and let  $\mathbf{H}_t = \{\mathbf{V}_i\}_{i=1}^{t-1}$  denote experimental history up to time  
436 step  $t$ . It is verifiable that  $\mathbb{E}[Z_t \mid \mathbf{H}_t] = 0$  and  $|Z_t| \leq 1$ . This means that  $Z_1, \dots, Z_T$  is a sequence  
437 of martingale differences. Azuma-Hoeffding inequality [18] implies that for all  $\epsilon > 0$  and  $T \in \mathbb{N}$ ,

$$P\left(\sum_{t=1}^T Z_t > \epsilon\right) \leq \exp\left(-\frac{\epsilon^2}{2T}\right). \quad (25)$$

438 Setting  $\epsilon = \sqrt{2T \log(T/\delta)}$  we obtain the claimed bound.  $\square$

439 **Lemma 4.** Assume that  $M \in \mathcal{M}_t$  for all time steps  $t = 1, 2, \dots$ . Let  $M_t$  be the solution of the inner  
440 maximization in Eq. (5). For all  $\delta \in (0, 1)$  and  $T > 1$ ,

$$\sum_{t=1}^T \mathbb{E}_{M_t}[Y \mid \text{do}(\pi_t)] - \mathbb{E}_M[Y \mid \text{do}(\pi_t)] \leq 17\Delta(\mathcal{G}, \mathbb{S}) \sqrt{|\mathbb{S}| T \ln(|\mathbf{V}(\mathbb{C})| T / \delta)}. \quad (26)$$

441 *Proof.* Let  $\mathcal{S}_t$  denote the scope of policy  $\pi_t$  at time step  $t$ . Let variables in  $\mathbf{V}(\mathbb{C}_{\mathcal{S}_t})$  be ordered by  
442  $V^{(1)} \prec V^{(2)} \prec \dots \prec V^{(k)}$  following a topological ordering in  $\mathcal{G}_{\mathcal{S}_t}$ . For any  $i = 0, \dots, k$ , define

$$\mathbb{E}^{(i)}[Y \mid \text{do}(\pi_t)] = \sum_{\mathbf{v}(\mathbb{C}_{\mathcal{S}_t}) \setminus y} y \prod_{j=1}^i P_M(v^{(j)} \mid \mathbf{pa}_{V^{(j)}}^+) \prod_{j=i+1}^k P_{M_t}(v^{(j)} \mid \mathbf{pa}_{V^{(j)}}^+). \quad (27)$$

443 By a telescoping sum,  $\mathbb{E}_{M_t}[Y \mid \text{do}(\pi_t)] - \mathbb{E}_M[Y \mid \text{do}(\pi_t)]$  for any time  $t$  could be written as

$$\mathbb{E}_{M_t}[Y \mid \text{do}(\pi_t)] - \mathbb{E}_M[Y \mid \text{do}(\pi_t)] = \sum_{i=0}^{k-1} \mathbb{E}^{(i)}[Y \mid \text{do}(\pi_t)] - \mathbb{E}^{(i+1)}[Y \mid \text{do}(\pi_t)]. \quad (28)$$

444 Observe that for any  $i = 0, 1, \dots, k$ , expected rewards  $\mathbb{E}^{(i)}[Y \mid \text{do}(\pi_t)]$  and  $\mathbb{E}^{(i+1)}[Y \mid \text{do}(\pi_t)]$  only  
445 differ in the factor of  $P(v^{(i)} \mid \mathbf{pa}_{V^{(i)}}^+)$ . This implies

$$\mathbb{E}^{(i)}[Y \mid \text{do}(\pi_t)] - \mathbb{E}^{(i+1)}[Y \mid \text{do}(\pi_t)] \leq \sum_{\mathbf{pa}_{V^{(i)}}^+} \|P_{M_t}(\cdot \mid \mathbf{pa}_{V^{(i)}}^+) - P_M(\cdot \mid \mathbf{pa}_{V^{(i)}}^+)\|_1 \quad (29)$$

$$\leq \sum_{\mathbf{pa}_{V^{(i)}}^+} \|P_{M_t}(\cdot \mid \mathbf{pa}_{V^{(i)}}^+) - \hat{P}_t(\cdot \mid \mathbf{pa}_{V^{(i)}}^+)\|_1 \quad (30)$$

$$+ \sum_{\mathbf{pa}_{V^{(i)}}^+} \|\hat{P}_t(\cdot \mid \mathbf{pa}_{V^{(i)}}^+) - P_M(\cdot \mid \mathbf{pa}_{V^{(i)}}^+)\|_1 \quad (31)$$

446 Since both  $M$  and  $M_t$  is contained in the hypothesis class  $\mathcal{M}_t$ ,

$$\mathbb{E}^{(i)}[Y \mid \text{do}(\pi_t)] - \mathbb{E}^{(i+1)}[Y \mid \text{do}(\pi_t)] \leq \sum_{\mathbf{pa}_{V^{(i)}}^+} 2 \sqrt{\frac{6|\Omega_V| \ln(2|\Omega_{PA_V^+}| |\mathbf{V}(\mathbb{C})| t / \delta)}{\max\{n_t(\mathbf{pa}_{V^{(i)}}^+), 1\}}} \quad (32)$$

447 For any  $\mathcal{S} \in \mathbb{S}$ , let  $T(\mathcal{S})$  be a subset of  $\{1, \dots, T\}$  containing time steps  $t$  such that  $\pi_t \sim \mathcal{S}$ . We have

$$\sum_{t=1}^T \mathbb{E}_{M_t}[Y \mid \text{do}(\pi_t)] - \mathbb{E}_M[Y \mid \text{do}(\pi_t)] \quad (33)$$

$$= \sum_{\mathcal{S} \in \mathbb{S}} \sum_{t \in T(\mathcal{S})} \mathbb{E}_{M_t}[Y \mid \text{do}(\pi_t)] - \mathbb{E}_M[Y \mid \text{do}(\pi_t)] \quad (34)$$

$$= \sum_{\mathcal{S} \in \mathbb{S}} \sum_{t \in T(\mathcal{S})} \sum_{i=0}^{k-1} \mathbb{E}^{(i)}[Y \mid \text{do}(\pi_t)] - \mathbb{E}^{(i+1)}[Y \mid \text{do}(\pi_t)] \quad (35)$$

$$\leq \sum_{\mathcal{S} \in \mathbb{S}} \sum_{t \in T(\mathcal{S})} \sum_{i=0}^{k-1} 2 \sqrt{\frac{6|\Omega_V| \ln(2|\Omega_{PA_V^+}| |\mathbf{V}(\mathbb{C})| t / \delta)}{\max\{n_t(\mathbf{pa}_{V^{(i)}}^+), 1\}}} \quad (36)$$

448 Let  $n_t(\mathcal{S})$  denote the total occurrence of event  $\pi_t \sim \mathcal{S}$  prior to time  $t$ . Applying [22, C.3] gives

$$\sum_{t=1}^T \mathbb{E}_{M_t}[Y \mid \text{do}(\pi_t)] - \mathbb{E}_M[Y \mid \text{do}(\pi_t)] \quad (37)$$

$$\leq \sum_{\mathcal{S} \in \mathbb{S}} \sum_{V \in \mathbf{V}(\mathbb{C}_{\mathcal{S}})} 12 \sqrt{|\Omega_{V \cup PA_V^+}| n_{T+1}(\mathcal{S}) \ln(2|\Omega_{PA_V^+}| |\mathbf{V}(\mathbb{C})| T / \delta)} \quad (38)$$

$$\leq \sum_{\mathcal{S} \in \mathbb{S}} \sqrt{n_{T+1}(\mathcal{S})} \max_{\mathcal{S} \in \mathbb{S}} \sum_{V \in \mathbf{V}(\mathbb{C}_{\mathcal{S}})} 12 \sqrt{|\Omega_{V \cup PA_V^+}| \ln(2|\Omega_{PA_V^+}| |\mathbf{V}(\mathbb{C})| T / \delta)} \quad (39)$$

449 Applying Jensen's inequality we obtain

$$\begin{aligned} & \sum_{t=1}^T \mathbb{E}_{M_t}[Y \mid \text{do}(\pi_t)] - \mathbb{E}_M[Y \mid \text{do}(\pi_t)] \\ & \leq \max_{S \in \mathbb{S}} \sum_{V \in \mathbf{V}(\mathcal{C}_S)} 12 \sqrt{|\Omega_{V \cup \text{PA}_V^+}| |\mathbb{S}| T \ln \left( 2 |\Omega_{\text{PA}_V^+}| |\mathbf{V}(\mathcal{C})| T / \delta \right)} \end{aligned} \quad (40)$$

450 A few simplification gives the claimed bound

$$\sum_{t=1}^T \mathbb{E}_{M_t}[Y \mid \text{do}(\pi_t)] - \mathbb{E}_M[Y \mid \text{do}(\pi_t)] \leq 17 \Delta(\mathcal{G}, \mathbb{S}) \sqrt{|\mathbb{S}| T \ln (|\mathbf{V}(\mathcal{C})| T / \delta)} \quad (41)$$

451 where function  $\Delta(\mathcal{G}, \mathbb{S}) = \max_{S \in \mathbb{S}} \sum_{V \in \mathbf{V}(\mathcal{C}_S)} \sqrt{|\Omega_{V \cup \text{PA}_V^+}|}$ .  $\square$

452 **Theorem 1.** For a causal diagram  $\mathcal{G}$  and a mixed policy scope  $\mathbb{S}$ , fix a  $\delta \in (0, 1)$ . With probability at  
453 least  $1 - \delta$ , it holds for any  $T > 1$ , the regret of CAUSAL-UCB\* is bounded by

$$R(T, M) \leq 19 \Delta(\mathcal{G}, \mathbb{S}) \sqrt{|\mathbb{S}| T \ln (|\mathbf{V}(\mathcal{C})| T / \delta)}. \quad (9)$$

454 where function  $\Delta(\mathcal{G}, \mathbb{S}) = \max_{S \in \mathbb{S}} \Delta(\mathcal{G}, S)$  and  $\Delta(\mathcal{G}, S) = \sum_{V \in \mathbf{V}(\mathcal{C}_S)} \sqrt{|\Omega_{V \cup \text{PA}_V^+}|}$ .

455 *Proof.* The cumulative regret  $R(T, M)$  could be written as follows, by a telescoping sum:

$$R(T, M) = \sum_{t=1}^T \mathbb{E}_M[Y \mid \text{do}(\pi^*)] - Y_t \quad (42)$$

$$= \sum_{t=1}^T \mathbb{E}_M[Y \mid \text{do}(\pi^*)] - \mathbb{E}_M[Y \mid \text{do}(\pi_t)] + \sum_{t=1}^T \mathbb{E}_M[Y \mid \text{do}(\pi_t)] - Y_t \quad (43)$$

456 Lem. 2 implies that w.p.  $1 - \frac{\delta}{2}$ , the actual SCM  $M \in \mathcal{M}_t$  for all time steps  $t$ . Since  $M_t$  and  $\pi_t$  are  
457 the optimistic instance in  $\mathcal{M}_t$  that achieves the maximal expected reward,

$$R(T, M) \leq \sum_{t=1}^T \mathbb{E}_{M_t}[Y \mid \text{do}(\pi_t)] - \mathbb{E}_M[Y \mid \text{do}(\pi_t)] + \sum_{t=1}^T \mathbb{E}_M[Y \mid \text{do}(\pi_t)] - Y_t \quad (44)$$

458 Among quantities in the above equation, Lem. 3 implies that w.p.  $1 - \frac{\delta}{2}$ ,

$$\sum_{t=1}^T \mathbb{E}_M[Y \mid \text{do}(\pi_t)] - Y_t \leq \sqrt{2T \log (T / \delta)} \quad (45)$$

459 Applying Lem. 4 gives the following bound:

$$\sum_{t=1}^T \mathbb{E}_{M_t}[Y \mid \text{do}(\pi_t)] - \mathbb{E}_M[Y \mid \text{do}(\pi_t)] \leq 17 \Delta(\mathcal{G}, \mathbb{S}) \sqrt{|\mathbb{S}| T \ln (|\mathbf{V}(\mathcal{C})| T / \delta)}. \quad (46)$$

460 The above equations together imply

$$R(T, M) \leq 17 \Delta(\mathcal{G}, \mathbb{S}) \sqrt{|\mathbb{S}| T \ln (|\mathbf{V}(\mathcal{C})| T / \delta)} + \sqrt{2T \log (T / \delta)} \quad (47)$$

$$\leq 19 \Delta(\mathcal{G}, \mathbb{S}) \sqrt{|\mathbb{S}| T \ln (|\mathbf{V}(\mathcal{C})| T / \delta)} \quad (48)$$

461 The error probabilities are bounded by  $\frac{\delta}{2} + \frac{\delta}{2} = \delta$ . This proves the claimed regret bound.  $\square$

462 **Theorem 3.** Given a causal diagram  $\mathcal{G}$ , a mixed policy scope  $\mathbb{S}$ , and a prior distribution  $\rho$ , it holds  
463 for any  $T > 1$ , the regret of CAUSAL-TS\* is bounded by

$$R(T, \rho) \leq 26 \Delta(\mathcal{G}, \mathbb{S}) \sqrt{|\mathbb{S}| T \ln (|\mathbf{V}(\mathcal{C})| T)}. \quad (19)$$

464 *Proof.* The idea of the proof was established in [42, 34]. First, note that given any sample history  
 465  $\mathbf{H}_t = \{\mathbf{V}_i\}_{i=1}^{t-1}$ , the true SCM  $M$  and the sampled  $M_t$  are identically distributed. That means that

$$\mathbb{E}[\mathbb{E}_M[Y \mid \text{do}(\pi^*) \mid \mathbf{H}_t, M \sim \rho]] = \mathbb{E}[\mathbb{E}_{M_t}[Y \mid \text{do}(\pi_t) \mid \mathbf{H}_t, M_t \sim \rho]] \quad (49)$$

466 Since  $Y_t \sim P(Y \mid \text{do}(\pi_t))$ , we also have

$$\mathbb{E}[Y_t \mid \mathbf{H}_t, M \sim \rho] = \mathbb{E}[\mathbb{E}_M[Y \mid \text{do}(\pi_t) \mid \mathbf{H}_t, M \sim \rho]] \quad (50)$$

467 The Bayesian cumulative regret  $R(T, \rho)$  could thus be written as:

$$R(T, \rho) = \mathbb{E} \left[ \sum_{t=1}^T \mathbb{E}_M[Y \mid \text{do}(\pi^*)] - Y_t \mid M \sim \rho \right] \quad (51)$$

$$= \mathbb{E} \left[ \sum_{t=1}^T \mathbb{E}_{M_t}[Y \mid \text{do}(\pi_t)] - Y_t \mid M, M_t \sim \rho \right] \quad (52)$$

$$= \mathbb{E} \left[ \sum_{t=1}^T \mathbb{E}_{M_t}[Y \mid \text{do}(\pi_t)] - \mathbb{E}_M[Y \mid \text{do}(\pi_t) \mid M, M_t \sim \rho] \right] \quad (53)$$

468 We can use  $\rho(M \mid \mathbf{H}_t) = \rho(M_t \mid \mathbf{H}_t)$  again and say that both  $M$  and  $M_t$  belongs to  $\mathcal{M}_t$  for all time  
 469 steps  $t$  w.p. at least  $1 - \delta$  (Lem. 2). This means that we can bound  $R(T, \rho)$  in CAUSAL-TS\*

$$R(T, \rho) \leq \mathbb{E} \left[ \sum_{t=1}^T \mathbb{E}_{M_t}[Y \mid \text{do}(\pi_t)] - \mathbb{E}_M[Y \mid \text{do}(\pi_t) \mid M, M_t \in \mathcal{M}_t] \right] + \delta T \quad (54)$$

$$\leq 17\Delta(\mathcal{G}, \mathbb{S}) \sqrt{|\mathbb{S}| T \ln(|\mathbf{V}(\mathbb{C})| T / \delta)} + \delta T \quad (55)$$

470 The last step follows from Lem. 4. Setting  $\delta = \frac{1}{T}$  we obtain the claimed bound.  $\square$

## 471 A.2 C-Canonical SCMs

472 In this section, we provide proofs for theoretical results related to C-canonical SCMs.

473 **Theorem 2.** For any SCM  $M = \langle \mathbf{V}, \mathbf{U}, \mathcal{F}, P(\mathbf{U}) \rangle$ , let  $\mathbb{C}$  be an arbitrary c-collection. For any  
 474  $\mathcal{C} \in \mathbb{C}$ , c-factor  $Q[\mathcal{C}]$  decomposes as follows:

$$Q[\mathcal{C}](\mathbf{v}) = \sum_{U \in \mathbf{U}} \sum_{u=1, \dots, d_U} \prod_{V \in \mathcal{C}} \mathbb{1}\{f_V(\mathbf{pa}_V, \mathbf{u}_V) = v\} \prod_{U \in \mathbf{U}} P(u) \quad (11)$$

475 where for every exogenous  $U \in \mathbf{U}$ ,  $P(U)$  is a discrete distribution over a finite domain  $\{1, \dots, d_U\}$   
 476 with cardinality  $d_U = \sum_{\mathcal{C} \in \mathbb{C}(U)} |\Omega_{Pa(\mathcal{C})}|$ ;  $\mathbb{C}(U) \subseteq \mathbb{C}$  are c-components covering  $U$ .

477 *Proof.* Let  $\vec{P}$  be a vector representing all values of c-factors  $Q[\mathcal{C}]$  contained in  $\mathbb{C}$ . Formally,

$$\vec{P} = (Q[\mathcal{C}](\mathbf{c}, \mathbf{pa}_{\mathcal{C}}) \mid \forall \mathcal{C} \in \mathbb{C}, \forall \mathbf{c} \in \Omega_{\mathcal{C}}, \forall \mathbf{pa}_{\mathcal{C}} \in \Omega_{Pa(\mathcal{C})}) \quad (56)$$

478 where  $Pa_{\mathcal{C}} = Pa(\mathcal{C}) \setminus \mathcal{C}$ . Obviously,  $\vec{P}$  is a vector containing  $d = \sum_{\mathcal{C} \in \mathbb{C}(U)} |\Omega_{Pa(\mathcal{C})}|$  elements.  
 479 However, since for any  $\mathcal{C} \in \mathbb{C}$ ,  $\sum_{\mathcal{C}} Q[\mathcal{C}] = 1$ , it only takes a vector with  $d - 1$  dimensions to  
 480 determine  $\vec{P}$ . We could thus see  $\vec{P}$  as a point in the  $(d - 1)$ -dimensional real space. Following the  
 481 discretization procedure in [60, Lem. A.6] we obtain the claimed decomposition.  $\square$

482 **Proposition 1.** For a causal diagram  $\mathcal{G}$  and a c-collection  $\mathbb{C}$ , MINCOLLECT( $\mathcal{G}, \mathbb{C}$ ) returns a minimal  
 483 reduction  $\mathbb{C}^*$  of  $\mathbb{C}$ .

484 *Proof.* The soundness of IDENTIFY implies that MINCOLLECT must returns a valid reduction  $\mathbb{C}^*$   
 485 of c-collection  $\mathbb{C}$  in  $\mathcal{G}$ . What remains is to show that  $\mathbb{C}^*$  is minimal. Suppose  $\mathbb{C}^*$  is not minimal.  
 486 That is, there exists a c-component  $\mathcal{C} \in \mathbb{C}^*$  such that  $Q[\mathcal{C}]$  is identifiable from other c-factors  
 487  $Q[\mathcal{C}']$  in  $\mathbb{C}^* \setminus \{\mathcal{C}\}$  in  $\mathcal{G}$ . It follows from the construction procedure in [31, Theorem 3] that one  
 488 could construct a pair of SCMs  $M_1, M_2$  compatible with  $\mathcal{G}$  such that  $Q_{M_1}[\mathcal{C}] \neq Q_{M_2}[\mathcal{C}]$  while  
 489  $Q_{M_1}[\mathcal{C}'] = Q_{M_2}[\mathcal{C}']$  for any other  $\mathcal{C}' \in \mathbb{C}^* \setminus \{\mathcal{C}\}$ . This means that  $Q[\mathcal{C}]$  is not identifiable from  
 490  $\mathbb{C}^* \setminus \{\mathcal{C}\}$  in  $\mathcal{G}$ , which is a contradiction.  $\square$

491 **Proposition 2.** For a causal diagram  $\mathcal{G}$ , any  $c$ -collection  $\mathbb{C}$  has a unique minimal reduction.

492 *Proof.* We will utilize the following claim

493 **Claim 1.** If  $\mathbb{C}_1$  and  $\mathbb{C}_2$  are both reductions of a  $c$ -collection  $\mathbb{C}$  in a causal diagram  $\mathcal{G}$ , then  $\mathbb{C}_1 \cap \mathbb{C}_2$   
 494 is a reduction of both  $\mathbb{C}_1$  and  $\mathbb{C}_2$  in  $\mathcal{G}$ .

495 The uniqueness of the minimal reduction of any  $c$ -collection  $\mathbb{C}$  follows immediately from the above  
 496 claim. Suppose  $\mathbb{C}$  has two different minimal reductions  $\mathbb{C}_1, \mathbb{C}_2$ . Claim 1 implies that their intersection  
 497  $\mathbb{C}_1 \cap \mathbb{C}_2$  is a reduction of  $\mathbb{C}_1$  and  $\mathbb{C}_2$ , which contradicts the assumption that  $\mathbb{C}_1$  and  $\mathbb{C}_2$  are both  
 498 minimal reductions.

499 Next we will provide the proof for Claim 1. Let  $m_i = |\mathbb{C} \setminus \mathbb{C}_i|$  where  $i = 1, 2$ . We will show the  
 500 result by induction after  $m = m_1 + m_2$ .

501 **Base Case:**  $m = 2$ . Let  $\mathbb{C}_i = \mathbb{C} \setminus \mathbb{C}_i$  for  $i = 1, 2$ . It suffices to show that  $\mathbb{C}_1 \in \mathbb{C}_2$  is identifiable  
 502 from  $c$ -factors in  $\mathbb{C}_2 \setminus \{\mathbb{C}_1\}$ . MINCOLLECT shows that  $\mathbb{C}_1$  is identifiable from  $\mathbb{C}_1$  if and only if  
 503 there exists a  $c$ -component  $\mathcal{C} \in \mathbb{C}_1$  such that  $Q[\mathbb{C}_1]$  is identifiable from  $Q[\mathcal{C}]$ . If  $\mathcal{C} \neq \mathbb{C}_2$ , we must  
 504 have  $\mathbb{C}_1 \cap \mathbb{C}_2 = \mathbb{C}_2 \setminus \{\mathbb{C}_1\}$  is a reduction of  $\mathbb{C}_2$  since  $\mathcal{C} \in \mathbb{C}_2$  and  $\text{IDENTIFY}(\mathbb{C}_1, \mathcal{C}, \mathcal{G}) \neq \text{FAIL}$ . If  
 505  $\mathcal{C} = \mathbb{C}_2$ , since  $\mathbb{C}_2$  is a reduction of  $\mathbb{C}$  by removing  $\mathbb{C}_2$ , there must exist  $c$ -component  $\mathcal{C}' \in \mathbb{C}$  such  
 506 that  $\text{IDENTIFY}(\mathbb{C}_2, \mathcal{C}', \mathcal{G}) \neq \text{FAIL}$ . Also, note that  $\mathcal{C}' \neq \mathbb{C}_1$ ; otherwise, one would have  $\mathbb{C}_1 = \mathbb{C}_2$   
 507 which contradicts the fact that  $\mathbb{C}_1 \neq \mathbb{C}_2$ . This means that  $\mathcal{C}' \in \mathbb{C}_1 \cap \mathbb{C}_2$ , which again implies that  $\mathbb{C}_1$   
 508 is identifiable from  $\mathbb{C}_2 \setminus \{\mathbb{C}_1\}$  in  $\mathcal{G}$ . We could thus obtain a reduction  $\mathbb{C}_1 \cap \mathbb{C}_2$  of  $\mathbb{C}_2$  by removing  
 509  $c$ -component  $\mathbb{C}_1$ . The proof for  $\mathbb{C}_1 \cap \mathbb{C}_2$  being a reduction of  $\mathbb{C}_1$  follows the same procedure.

510 **Induction Step:**  $m \leq k + 1$ . Suppose the result holds for  $m \leq k$  where  $k \geq 2$  and consider the  
 511 case  $m = k + 1$ . So  $\max\{m_1, m_2\} > 1$ , say  $m_2 > 1$ . Thus  $\mathbb{C}_2$  is obtained by successively removing  
 512  $m_2$  identifiable  $c$ -components from  $\mathbb{C}$ . Let  $\mathbb{C}'_2$  be a reduction obtained by removing the first  $m_2 - 1$   
 513 of these. By the induction assumption,  $\mathbb{C}_1 \cap \mathbb{C}'_2$  is a reduction of  $\mathbb{C}_2$  obtained by removing at most  $m_1$   
 514 identifiable  $c$ -components from  $\mathbb{C}'_2$ . Furthermore,  $\mathbb{C}_2$  is also a reduction of  $\mathbb{C}'_2$  obtained by removing  
 515 exactly one identifiable  $c$ -component. Since  $(\mathbb{C}_1 \cap \mathbb{C}'_2) \cap \mathbb{C}_2 = \mathbb{C}_1 \cap \mathbb{C}_2$  and  $m_1 + 1 \leq k$ , the  
 516 induction assumption yields that  $\mathbb{C}_1 \cap \mathbb{C}_2$  is a reduction of  $\mathbb{C}_2$ . Similarly, the induction assumption  
 517 gives that  $\mathbb{C}_1 \cap \mathbb{C}_2$  is a reduction of  $\mathbb{C}_1$ . This completes the proof.  $\square$

## 518 B Simulation Setups

519 In all experiments, we evaluate our proposed CAUSAL-TS\* with uninformative Dirichlet priors over  
 520 exogenous probabilities and uniform priors over structural functions, which we label as  $c$ -ts\*. As a  
 521 baseline, we also include following algorithms. (1) Randomized trials ( $rcf$ ) allocating treatments in  
 522 all possible scopes uniformly at random; (2) standard Thompson sampling algorithm ( $ts$ ) using all  
 523 deterministic policies as arms; and (3) Thompson sampling over a simplified mixed scope ( $ts^*$ ), which  
 524 is obtained by applying graphical conditions in [30]. For each experiment, we randomly generate 100  
 525 instances of SCMs compatible with the corresponding causal diagram. For each random SCM, we  
 526 measure the cumulative regrets of all algorithms over  $T = 1.1 \times 10^3$  episodes. For every algorithm  
 527 in every random SCM instance, we repeat the online learning process for 100 times, and compute  
 528 the cumulative regret averaging over all repetitions. Finally, all experiments were performed on a  
 529 computer with 32GB memory, implemented in MATLAB.

## 530 C Related Work on Canonical SCMs

531 The idea of canonical SCMs was first explored in [5, 4], which introduced a  
 532 canonical partitioning of exogenous domains in the ‘TV’ diagram in Fig. 5.  
 533 For binary endogenous variables  $X, Y, Z \in \{0, 1\}$ , the canonical partitioning  
 534 allows one to discretize the domain of  $U$  into 16 equivalent classes without  
 535 changing the original counterfactual distributions and the graphical structure  
 536 in Fig. 5. Such discretization is also referred to as the principal stratification  
 537 [15, 37]. Based on this finite-state representation, tight bounding strategy was proposed to evaluate  
 538 treatment effects under the condition of imperfect compliance in randomized experiments [6]. There

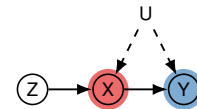

Figure 5: TV

539 also exist Bayesian approaches to obtain posterior distributions of causal effects provided with data  
540 collected from experimental studies with imperfect compliance [12, 20].

541 The canonical partitioning could be extended to a more generalized class of causal diagrams that are  
542 reducible to the “IV” graph [43, 56]. However, these methods do not necessarily encode all constraints  
543 over induced distributions. [14] showed that for a specific class of causal diagrams satisfying a running  
544 intersection property among exogenous variables, all equality and inequality constraints over the  
545 observational distribution could be generated using discrete unobserved domains. [41] applied a  
546 classic result of Carathéodory theorem in convex geometry [9] and developed a generative model  
547 with finite-state unobserved variables that could represent the observational distribution over discrete  
548 domains in an arbitrary causal diagram. More recently, [60] introduced a family of canonical  
549 SCMs that could represent all categorical counterfactual distributions in any causal diagram with  
550 finite exogenous states. Using this canonical representation, the problem of inferring counterfactual  
551 probabilities from the combination of observational and interventional data is reducible to a series  
552 of polynomial optimization programs [55, 13]. The computational framework of neural networks is  
553 also applicable to determine the identifiability of causal effects over discrete observed domains [54].  
554 Finally, representing distributions over continuous observed domains is more challenging; existing  
555 methods often require untestable parametric assumptions about the underlying environment [23, 19].

556 Thm. 2 extends existing results in several non-trivial ways. First, the cardinality of exogenous states  
557 in canonical SCMs [60] grows exponentially with regard to the total number of observed states. The  
558 restricted family of canonical SCM in Thm. 2 is tailored for an arbitrary collection of c-components  
559 in the causal diagram. This means that, in many cases, the cardinality of exogenous domains in  
560 C-canonical SCMs could be sparse, growing as a polynomial function of the size of observed states.  
561 Second, we propose a novel algorithm (Alg. 2) to exploit equality relationships among c-factors. This  
562 allows us to further reduce the model complexity of C-canonical SCMs while maintaining the same  
563 qualitative and quantitative constraints over parameters of target c-factors.

## 564 References

- 565 [1] P. Auer, N. Cesa-Bianchi, and P. Fischer. Finite-time analysis of the multiarmed bandit problem.  
566 *Machine Learning*, 47(2/3):235–256, 2002.
- 567 [2] P. Auer, T. Jaksch, and R. Ortner. Near-optimal regret bounds for reinforcement learning. In  
568 *Advances in neural information processing systems*, pages 89–96, 2009.
- 569 [3] K. Azizzadenesheli, A. Lazaric, and A. Anandkumar. Reinforcement learning of pomdp’s using  
570 spectral methods. In *COLT*, 2016.
- 571 [4] A. Balke and J. Pearl. Counterfactual probabilities: Computational methods, bounds, and  
572 applications. In R. L. de Mantaras and D. Poole, editors, *Uncertainty in Artificial Intelligence*  
573 *10*, pages 46–54. Morgan Kaufmann, San Mateo, CA, 1994.
- 574 [5] A. Balke and J. Pearl. Probabilistic evaluation of counterfactual queries. In *Proceedings of the*  
575 *Twelfth National Conference on Artificial Intelligence*, volume I, pages 230–237. MIT Press,  
576 Menlo Park, CA, 1994.
- 577 [6] A. Balke and J. Pearl. Bounds on treatment effects from studies with imperfect compliance.  
578 *Journal of the American Statistical Association*, 92(439):1172–1176, September 1997.
- 579 [7] E. Bareinboim, J. D. Correa, D. Ibeling, and T. Icard. On pearl’s hierarchy and the foundations  
580 of causal inference. In *Probabilistic and Causal Inference: The Works of Judea Pearl*, page  
581 507–556. Association for Computing Machinery, New York, NY, USA, 1st edition, 2022.
- 582 [8] E. Bareinboim and J. Pearl. Causal inference and the data-fusion problem. *Proceedings of the*  
583 *National Academy of Sciences*, 113:7345–7352, 2016.
- 584 [9] C. Carathéodory. Über den variabilitätsbereich der fourier’schen konstanten von positiven har-  
585 monischen funktionen. *Rendiconti Del Circolo Matematico di Palermo (1884-1940)*, 32(1):193–  
586 217, 1911.
- 587 [10] N. Cesa-Bianchi and G. Lugosi. Combinatorial bandits. *Journal of Computer and System*  
588 *Sciences*, 78(5):1404–1422, 2012.

- 589 [11] W. Chen, Y. Wang, and Y. Yuan. Combinatorial multi-armed bandit: General framework and  
590 applications. In *International conference on machine learning*, pages 151–159. PMLR, 2013.
- 591 [12] D. Chickering and J. Pearl. A clinician’s tool for analyzing non-compliance. *Computing Science  
592 and Statistics*, 29(2):424–431, 1997.
- 593 [13] G. Duarte, N. Finkelstein, D. Knox, J. Mummolo, and I. Shpitser. An automated approach to  
594 causal inference in discrete settings. *arXiv preprint arXiv:2109.13471*, 2021.
- 595 [14] R. J. Evans. Margins of discrete bayesian networks. *The Annals of Statistics*, 46(6A):2623–2656,  
596 2018.
- 597 [15] C. Frangakis and D. Rubin. Principal stratification in causal inference. *Biometrics*, 1(58):21–29,  
598 2002.
- 599 [16] M. R. Garey and D. S. Johnson. *Computers and intractability*, volume 174. freeman San  
600 Francisco, 1979.
- 601 [17] Z. D. Guo, S. Doroudi, and E. Brunskill. A pac rl algorithm for episodic pomdps. In *Artificial  
602 Intelligence and Statistics*, pages 510–518, 2016.
- 603 [18] W. Hoeffding. Probability inequalities for sums of bounded random variables. *Journal of the  
604 American Statistical Association*, 58(301):13–30, 1963.
- 605 [19] Y. Hu, Y. Wu, L. Zhang, and X. Wu. A generative adversarial framework for bounding  
606 confounded causal effects. In *Proceedings of the 35th AAAI Conference on Artificial Intelligence*,  
607 2021.
- 608 [20] G. W. Imbens and D. B. Rubin. Bayesian inference for causal effects in randomized experiments  
609 with noncompliance. *The annals of statistics*, pages 305–327, 1997.
- 610 [21] H. Ishwaran and L. F. James. Gibbs sampling methods for stick-breaking priors. *Journal of the  
611 American Statistical Association*, 96(453):161–173, 2001.
- 612 [22] T. Jaksch, R. Ortner, and P. Auer. Near-optimal regret bounds for reinforcement learning.  
613 *Journal of Machine Learning Research*, 11(Apr):1563–1600, 2010.
- 614 [23] N. Kilbertus, M. Kusner, and R. Silva. A class of algorithms for general instrumental variable  
615 models. *Advances in Neural Information Processing Systems (NeurIPS 2020)*, 2020.
- 616 [24] D. Koller and B. Milch. Multi-agent influence diagrams for representing and solving games.  
617 *Games and economic behavior*, 45(1):181–221, 2003.
- 618 [25] T. L. Lai and H. Robbins. Asymptotically efficient adaptive allocation rules. *Advances in  
619 applied mathematics*, 6(1):4–22, 1985.
- 620 [26] J. Langford and T. Zhang. The epoch-greedy algorithm for contextual multi-armed bandits.  
621 *Advances in neural information processing systems*, 20(1):96–1, 2007.
- 622 [27] S. L. Lauritzen and D. Nilsson. Representing and solving decision problems with limited  
623 information. *Management Science*, 47(9):1235–1251, 2001.
- 624 [28] S. Lee and E. Bareinboim. Structural causal bandits: where to intervene? In *Advances in Neural  
625 Information Processing Systems*, pages 2568–2578, 2018.
- 626 [29] S. Lee and E. Bareinboim. Structural causal bandits with non-manipulable variables. In  
627 *Proceedings of the AAAI Conference on Artificial Intelligence*, volume 33, pages 4164–4172,  
628 2019.
- 629 [30] S. Lee and E. Bareinboim. Characterizing optimal mixed policies: Where to intervene and what  
630 to observe. *Advances in Neural Information Processing Systems*, 33, 2020.
- 631 [31] S. Lee, J. D. Correa, and E. Bareinboim. General identifiability with arbitrary surrogate  
632 experiments. In *In Proceedings of the 35th Conference on Uncertainty in Artificial Intelligence*,  
633 2019.

- 634 [32] M. Magill and L. A. Ray. Cognitive-behavioral treatment with adult alcohol and illicit drug  
635 users: a meta-analysis of randomized controlled trials. *Journal of studies on alcohol and drugs*,  
636 70(4):516–527, 2009.
- 637 [33] S. A. Murphy, M. J. van der Laan, J. M. Robins, and Conduct Problems Prevention Research  
638 Group. Marginal Mean Models for Dynamic Regimes. *Journal of the American Statistical*  
639 *Association*, 96(456):1410–1423, Dec. 2001.
- 640 [34] I. Osband, D. Russo, and B. Van Roy. (more) efficient reinforcement learning via posterior  
641 sampling. In *Advances in Neural Information Processing Systems*, pages 3003–3011, 2013.
- 642 [35] I. Osband and B. Van Roy. Why is posterior sampling better than optimism for reinforcement  
643 learning? In *Proceedings of the 34th International Conference on Machine Learning-Volume*  
644 *70*, pages 2701–2710. JMLR. org, 2017.
- 645 [36] J. Pearl. *Causality: Models, Reasoning, and Inference*. Cambridge University Press, New York,  
646 2000.
- 647 [37] J. Pearl. Principal stratification – a goal or a tool? *The International Journal of Biostatistics*,  
648 7(1), 2011.
- 649 [38] D. Precup, R. S. Sutton, and S. P. Singh. Eligibility traces for off-policy policy evaluation. In  
650 *Proceedings of the Seventeenth International Conference on Machine Learning*, pages 759–766,  
651 2000.
- 652 [39] M. L. Puterman. *Markov Decision Processes: Discrete Stochastic Dynamic Programming*. John  
653 Wiley & Sons, Inc., 1994.
- 654 [40] H. Robbins. Some aspects of the sequential design of experiments. *Bull. Amer. Math. Soc.*,  
655 58(5):527–535, 09 1952.
- 656 [41] D. Rosset, N. Gisin, and E. Wolfe. Universal bound on the cardinality of local hidden variables  
657 in networks. *Quantum Information and Computation*, 18(11&12):0910–0926, 2018.
- 658 [42] D. Russo and B. Van Roy. Learning to optimize via posterior sampling. *Mathematics of*  
659 *Operations Research*, 39(4):1221–1243, 2014.
- 660 [43] M. C. Sachs, G. Jonzon, A. Sjölander, and E. E. Gabriel. A general method for deriving tight  
661 symbolic bounds on causal effects. *arXiv preprint arXiv:2003.10702*, 2020.
- 662 [44] P. Spirtes, C. N. Glymour, and R. Scheines. *Causation, prediction, and search*. MIT press,  
663 2000.
- 664 [45] A. L. Strehl, L. Li, E. Wiewiora, J. Langford, and M. L. Littman. Pac model-free reinforcement  
665 learning. In *Proceedings of the 23rd international conference on Machine learning*, pages  
666 881–888. ACM, 2006.
- 667 [46] M. Strens. A bayesian framework for reinforcement learning. In *ICML*, volume 2000, pages  
668 943–950, 2000.
- 669 [47] R. S. Sutton, H. R. Maei, and C. Szepesvári. A convergent o(n) temporal-difference algorithm  
670 for off-policy learning with linear function approximation. In *Advances in neural information*  
671 *processing systems*, pages 1609–1616, 2009.
- 672 [48] A. Swaminathan and T. Joachims. Counterfactual risk minimization: Learning from logged  
673 bandit feedback. In *International Conference on Machine Learning*, pages 814–823, 2015.
- 674 [49] I. Szita and C. Szepesvári. Model-based reinforcement learning with nearly tight exploration  
675 complexity bounds. In *Proceedings of the 27th International Conference on Machine Learning*  
676 *(ICML-10)*, pages 1031–1038, 2010.
- 677 [50] W. R. Thompson. On the likelihood that one unknown probability exceeds another in view of  
678 the evidence of two samples. *Biometrika*, 25(3/4):285–294, 1933.



- 679 [51] J. Tian. *Studies in Causal Reasoning and Learning*. PhD thesis, Computer Science Department,  
680 University of California, Los Angeles, CA, November 2002.
- 681 [52] J. Tian. Identifying dynamic sequential plans. In *Proceedings of the Twenty-Fourth Conference*  
682 *on Uncertainty in Artificial Intelligence*, UAI'08, pages 554–561, Arlington, Virginia, United  
683 States, 2008. AUAI Press.
- 684 [53] J. Tian and J. Pearl. A general identification condition for causal effects. In *Proceedings of the*  
685 *Eighteenth National Conference on Artificial Intelligence (AAAI 2002)*, pages 567–573, Menlo  
686 Park, CA, 2002. AAAI Press/The MIT Press.
- 687 [54] K. Xia, K.-Z. Lee, Y. Bengio, and E. Bareinboim. The causal-neural connection: Expressiveness,  
688 learnability, and inference. In M. Ranzato, A. Beygelzimer, Y. Dauphin, P. Liang, and J. W.  
689 Vaughan, editors, *Advances in Neural Information Processing Systems*, volume 34, pages  
690 10823–10836. Curran Associates, Inc., 2021.
- 691 [55] M. Zaffalon, A. Antonucci, and R. Cabañas. Causal expectation-maximisation. *arXiv preprint*  
692 *arXiv:2011.02912*, 2020.
- 693 [56] M. Zaffalon, A. Antonucci, and R. Cabañas. Structural causal models are (solvable by) credal  
694 networks. In *International Conference on Probabilistic Graphical Models*, pages 581–592.  
695 PMLR, 2020.
- 696 [57] J. Zhang and E. Bareinboim. Transfer learning in multi-armed bandits: a causal approach.  
697 In *Proceedings of the 26th International Joint Conference on Artificial Intelligence*, pages  
698 1340–1346. AAAI Press, 2017.
- 699 [58] J. Zhang and E. Bareinboim. Near-optimal reinforcement learning in dynamic treatment regimes.  
700 In *Advances in Neural Information Processing Systems*, pages 13401–13411, 2019.
- 701 [59] J. Zhang and E. Bareinboim. Designing optimal dynamic treatment regimes: A causal reinforce-  
702 ment learning approach. In *International Conference on Machine Learning*, pages 11012–11022.  
703 PMLR, 2020.
- 704 [60] J. Zhang, T. Jin, and E. Bareinboim. Partial counterfactual identification from observational and  
705 experimental data. In *Proceedings of the 39th International Conference on Machine Learning*  
706 *(ICML-22)*, 2022.
